# Supplementary material for: Development, Analytical, and Clinical Evaluation of Rapid Immunochromatographic Antigen Test for SARS-CoV-2 Variants Detection
Source: MDPI journal article supplement (doi:10.3390/diagnostics12020381), 2022-02-02
Supplement: s1 [file s1]

**Supplementary Table S1** Cross reactivity and interference testing for the Kestrel™ COVID-19 Ag Rapid Test Kit.

| Potential cross-reactant                                                       | Concentration                | Cross-reactivity<br>(Yes/No) | Interference<br>(Yes/No) |
|--------------------------------------------------------------------------------|------------------------------|------------------------------|--------------------------|
| <i>Other viral nucleocapsid antigen</i>                                        |                              |                              |                          |
| SARS-coronavirus NP antigen                                                    | 10 µg/mL                     | Yes<br>(3/3 positive)        | No<br>(3/3 positive)     |
| MERS-coronavirus NP antigen                                                    | 10 µg/mL                     | No<br>(3/3 negative)         | No<br>(3/3 positive)     |
| Human coronavirus 229E NP antigen                                              | 10 µg/mL                     | No<br>(3/3 negative)         | No<br>(3/3 positive)     |
| Human coronavirus OC43 NP antigen                                              | 10 µg/mL                     | No<br>(3/3 negative)         | No<br>(3/3 positive)     |
| Human coronavirus NL63 NP antigen                                              | 10 µg/mL                     | No<br>(3/3 negative)         | No<br>(3/3 positive)     |
| Parainfluenza virus 1 NP antigen                                               | 180 µg/mL                    | No<br>(3/3 negative)         | No<br>(3/3 positive)     |
| Parainfluenza virus 2 NP antigen                                               | 180 µg/mL                    | No<br>(3/3 negative)         | No<br>(3/3 positive)     |
| Parainfluenza virus 3 NP antigen                                               | 180 µg/mL                    | No<br>(3/3 negative)         | No<br>(3/3 positive)     |
| Parainfluenza virus 4 NP antigen                                               | 180 µg/mL                    | No<br>(3/3 negative)         | No<br>(3/3 positive)     |
| Influenza A NP antigen                                                         | 180 µg/mL                    | No<br>(3/3 negative)         | No<br>(3/3 positive)     |
| Influenza B NP antigen                                                         | 180 µg/mL                    | No<br>(3/3 negative)         | No<br>(3/3 positive)     |
| <i>Other bacteria and yeast (whole cell protein)</i>                           |                              |                              |                          |
| <i>Haemophilus influenzae</i>                                                  | 1.5 x 10 <sup>8</sup> CFU/mL | No<br>(3/3 negative)         | No<br>(3/3 positive)     |
| <i>Streptococcus pneumoniae</i>                                                | 1.5 x 10 <sup>8</sup> CFU/mL | No<br>(3/3 negative)         | No<br>(3/3 positive)     |
| <i>Streptococcus pyogenes</i>                                                  | 1.5 x 10 <sup>8</sup> CFU/mL | No<br>(3/3 negative)         | No<br>(3/3 positive)     |
| <i>Candida albicans</i>                                                        | 10 <sup>6</sup> CFU/mL       | No<br>(3/3 negative)         | No<br>(3/3 positive)     |
| Pooled human nasal wash – representative of normal respiratory microbial flora | 100%                         | No<br>(3/3 negative)         | No<br>(3/3 positive)     |
| <i>Mycobacterium tuberculosis</i>                                              | >2×10 <sup>3</sup> CFU/mL    | No<br>(3/3 negative)         | No<br>(3/3 positive)     |
| <i>Staphylococcus aureus</i>                                                   | 1.5 x 10 <sup>8</sup> CFU/mL | No<br>(3/3 negative)         | No<br>(3/3 positive)     |
| <i>Staphylococcus epidermidis</i>                                              | 1.5 x 10 <sup>8</sup> CFU/mL | No<br>(3/3 negative)         | No<br>(3/3 positive)     |
