# Supplementary material for: Development, Analytical, and Clinical Evaluation of Rapid Immunochromatographic Antigen Test for SARS-CoV-2 Variants Detection
Source: MDPI journal article supplement (doi:10.3390/diagnostics12020381), 2022-02-02
Supplement: s1 [file s1]

**Supplementary Table S2** Clinical data and cycle threshold (Ct) values for SARS-CoV-2 positive samples for *ORF1AB* gene and *N* gene by real-time RT-PCR

compared with the Kestrel™ COVID-19 Ag Rapid Test Kit.

| Sample no. | Specimen ID       | Gender | Age | Date of collection | Date of Ag test kit Process | Kestrel Ag rapid test | Date of RT-PCR process | RT-PCR Ct value (Sansure®) |        | Internal control (IC) | RT-PCR interpretation | Patient symptoms                                              |
|------------|-------------------|--------|-----|--------------------|-----------------------------|-----------------------|------------------------|----------------------------|--------|-----------------------|-----------------------|---------------------------------------------------------------|
|            |                   |        |     |                    |                             |                       |                        | ORF1AB                     | N gene |                       |                       |                                                               |
| 1          | SARS-CoV-2-Pos-1  | F      | 47  | 3/08/2021          | 3/08/2021                   | Positive              | 2/08/2021              | 17.88                      | 15.18  | 27.09                 | Positive              | Fever, cough, congestion, headache, shortness of breath       |
| 2          | SARS-CoV-2-Pos-2  | F      | 27  | 3/08/2021          | 3/08/2021                   | Positive              | 2/08/2021              | 22.71                      | 18.06  | 28.56                 | Positive              | Asymptomatic                                                  |
| 3          | SARS-CoV-2-Pos-3  | F      | 43  | 3/08/2021          | 3/08/2021                   | Positive              | 2/08/2021              | 22.47                      | 19.47  | 25.56                 | Positive              | Asymptomatic                                                  |
| 4          | SARS-CoV-2-Pos-4  | M      | 31  | 3/08/2021          | 3/08/2021                   | Positive              | 2/08/2021              | 21.79                      | 18.82  | 25.98                 | Positive              | N/A*                                                          |
| 5          | SARS-CoV-2-Pos-5  | M      | 26  | 3/08/2021          | 3/08/2021                   | Positive              | 2/08/2021              | 24.56                      | 20.82  | 25.1                  | Positive              | N/A                                                           |
| 6          | SARS-CoV-2-Pos-6  | F      | 26  | 3/08/2021          | 3/08/2021                   | Positive              | 3/08/2021              | 14.91                      | 11.1   | 24.22                 | Positive              | N/A                                                           |
| 7          | SARS-CoV-2-Pos-7  | M      | 32  | 3/08/2021          | 3/08/2021                   | Positive              | 3/08/2021              | 16.82                      | 13.5   | 28.78                 | Positive              | N/A                                                           |
| 8          | SARS-CoV-2-Pos-8  | F      | 35  | 3/08/2021          | 3/08/2021                   | Positive              | 3/08/2021              | 18.04                      | 15.17  | 24.72                 | Positive              | N/A                                                           |
| 9          | SARS-CoV-2-Pos-9  | F      | 74  | 3/08/2021          | 3/08/2021                   | Positive              | 3/08/2021              | 18.15                      | 14.84  | 24.28                 | Positive              | N/A                                                           |
| 10         | SARS-CoV-2-Pos-10 | F      | 30  | 3/08/2021          | 3/08/2021                   | Positive              | 3/08/2021              | 22.77                      | 19     | 26.42                 | Positive              | N/A                                                           |
| 11         | SARS-CoV-2-Pos-11 | F      | 33  | 3/08/2021          | 3/08/2021                   | Positive              | 3/08/2021              | 19.23                      | 16.06  | 26.19                 | Positive              | N/A                                                           |
| 12         | SARS-CoV-2-Pos-12 | F      | 27  | 3/08/2021          | 3/08/2021                   | Positive              | 3/08/2021              | 26.4                       | 23.73  | 25.04                 | Positive              | N/A                                                           |
| 13         | SARS-CoV-2-Pos-13 | M      | 72  | 4/08/2021          | 4/08/2021                   | Positive              | 4/08/2021              | 26.31                      | 23.44  | 28.28                 | Positive              | Fever, headache, cough                                        |
| 14         | SARS-CoV-2-Pos-14 | F      | 63  | 5/08/2021          | 5/08/2021                   | Positive              | 5/08/2021              | 13.8                       | 11.59  | 26.77                 | Positive              | Asymptomatic                                                  |
| 15         | SARS-CoV-2-Pos-15 | M      | 29  | 5/08/2021          | 5/08/2021                   | Positive              | 5/08/2021              | 17.55                      | 13.42  | 28.25                 | Positive              | Asymptomatic                                                  |
| 16         | SARS-CoV-2-Pos-16 | F      | 30  | 5/08/2021          | 5/08/2021                   | Positive              | 5/08/2021              | 25.11                      | 22.42  | 26.27                 | Positive              | Asymptomatic                                                  |
| 17         | SARS-CoV-2-Pos-17 | F      | 39  | 5/08/2021          | 5/08/2021                   | Positive              | 5/08/2021              | 17.73                      | 15.16  | 28.01                 | Positive              | Asymptomatic                                                  |
| 18         | SARS-CoV-2-Pos-18 | M      | 27  | 5/08/2021          | 5/08/2021                   | Negative              | 5/08/2021              | 26.67                      | 23.88  | 26.97                 | Positive              | N/A                                                           |
| 19         | SARS-CoV-2-Pos-19 | F      | 45  | 7/08/2021          | 7/08/2021                   | Positive              | 7/08/2021              | 25.22                      | 21.99  | 28.21                 | Positive              | N/A                                                           |
| 20         | SARS-CoV-2-Pos-20 | M      | 64  | 7/08/2021          | 7/08/2021                   | Positive              | 7/08/2021              | 20.53                      | 17.68  | 27.25                 | Positive              | N/A                                                           |
| 21         | SARS-CoV-2-Pos-21 | F      | 31  | 7/08/2021          | 7/08/2021                   | Positive              | 7/08/2021              | 21.29                      | 17.2   | 26.71                 | Positive              | N/A                                                           |
| 22         | SARS-CoV-2-Pos-22 | F      | 24  | 13/08/2021         | 13/08/2021                  | Positive              | 13/08/2021             | 21.4                       | 17.72  | 27.99                 | Positive              | N/A                                                           |
| 23         | SARS-CoV-2-Pos-23 | F      | 33  | 13/08/2021         | 13/08/2021                  | Positive              | 13/08/2021             | 22.57                      | 19.58  | 27.39                 | Positive              | Asymptomatic                                                  |
| 24         | SARS-CoV-2-Pos-24 | M      | 18  | 13/08/2021         | 13/08/2021                  | Positive              | 13/08/2021             | 15.66                      | 13.14  | 27.69                 | Positive              | N/A                                                           |
| 25         | SARS-CoV-2-Pos-25 | M      | 26  | 13/08/2021         | 13/08/2021                  | Positive              | 13/08/2021             | 24.86                      | 21.87  | 31.3                  | Positive              | Asymptomatic                                                  |
| 26         | SARS-CoV-2-Pos-26 | F      | 57  | 13/08/2021         | 13/08/2021                  | Positive              | 13/08/2021             | 16.15                      | 13.33  | 28.45                 | Positive              | Asymptomatic                                                  |
| 27         | SARS-CoV-2-Pos-27 | F      | 44  | 13/08/2021         | 13/08/2021                  | Positive              | 13/08/2021             | 23.67                      | 20.69  | 26.72                 | Positive              | N/A                                                           |
| 28         | SARS-CoV-2-Pos-28 | M      | 71  | 15/08/2021         | 15/08/2021                  | Positive              | 15/08/2021             | 21.69                      | 18.69  | 27.07                 | Positive              | Cough, congestion, muscle aches, fatigue                      |
| 29         | SARS-CoV-2-Pos-29 | F      | 54  | 15/08/2021         | 15/08/2021                  | Positive              | 15/08/2021             | 20.4                       | 17     | 29.22                 | Positive              | N/A                                                           |
| 30         | SARS-CoV-2-Pos-30 | F      | 74  | 17/08/2021         | 17/08/2021                  | Positive              | 17/08/2021             | 23.22                      | 19.57  | 29.86                 | Positive              | Cough, congestion, headache, shortness of breath, sore throat |
| 31         | SARS-CoV-2-Pos-31 | F      | 18  | 17/08/2021         | 17/08/2021                  | Negative              | 17/08/2021             | 26.17                      | 23.34  | 26.57                 | Positive              | Asymptomatic                                                  |
| 32         | SARS-CoV-2-Pos-32 | F      | 23  | 17/08/2021         | 17/08/2021                  | Positive              | 17/08/2021             | 24.83                      | 21.79  | 26.63                 | Positive              | Asymptomatic                                                  |
| 33         | SARS-CoV-2-Pos-33 | F      | 30  | 17/08/2021         | 17/08/2021                  | Positive              | 17/08/2021             | 19.33                      | 16.66  | 28.58                 | Positive              | N/A                                                           |

|    |                   |   |    |            |            |          |            |        |       |       |          |                                                         |
|----|-------------------|---|----|------------|------------|----------|------------|--------|-------|-------|----------|---------------------------------------------------------|
| 34 | SARS-CoV-2-Pos-34 | F | 20 | 17/08/2021 | 17/08/2021 | Positive | 17/08/2021 | 23.88  | 21.27 | 26.38 | Positive | N/A                                                     |
| 35 | SARS-CoV-2-Pos-35 | M | 18 | 17/08/2021 | 17/08/2021 | Positive | 17/08/2021 | 12.28  | 18.1  | 27.07 | Positive | Asymptomatic                                            |
| 36 | SARS-CoV-2-Pos-36 | M | 51 | 17/08/2021 | 17/08/2021 | Positive | 17/08/2021 | 19.29  | 15.78 | 31.86 | Positive | Asymptomatic                                            |
| 37 | SARS-CoV-2-Pos-37 | F | 48 | 17/08/2021 | 17/08/2021 | Positive | 17/08/2021 | 18.91  | 15.03 | 26.91 | Positive | Asymptomatic                                            |
| 38 | SARS-CoV-2-Pos-38 | F | 37 | 20/08/2021 | 20/08/2021 | Positive | 20/08/2021 | 24.39  | 20.81 | 28.49 | Positive | Fever, cough,<br>congestion, headache                   |
| 39 | SARS-CoV-2-Pos-39 | F | 29 | 20/08/2021 | 20/08/2021 | Positive | 20/08/2021 | 21.15  | 17.6  | 28.75 | Positive | Muscle ache, headache                                   |
| 40 | SARS-CoV-2-Pos-40 | M | 33 | 20/08/2021 | 20/08/2021 | Positive | 20/08/2021 | 19.63  | 16.58 | 27.98 | Positive | Fever, cough,<br>congestion                             |
| 41 | SARS-CoV-2-Pos-41 | F | 32 | 20/08/2021 | 20/08/2021 | Positive | 20/08/2021 | 23.44  | 20.54 | 27.53 | Positive | Fever, cough,<br>congestion                             |
| 42 | SARS-CoV-2-Pos-42 | M | 23 | 20/08/2021 | 20/08/2021 | Positive | 20/08/2021 | 17.02  | 14.02 | 27.87 | Positive | Asymptomatic                                            |
| 43 | SARS-CoV-2-Pos-43 | M | 40 | 20/08/2021 | 20/08/2021 | Positive | 20/08/2021 | 26.65  | 21.94 | 26.41 | Positive | Asymptomatic                                            |
| 44 | SARS-CoV-2-Pos-44 | M | 43 | 20/08/2021 | 20/08/2021 | Positive | 20/08/2021 | 18.64  | 15.46 | 28.86 | Positive | Asymptomatic                                            |
| 45 | SARS-CoV-2-Pos-45 | F | 26 | 25/08/2021 | 25/08/2021 | Positive | 25/08/2021 | 22.84  | 19.86 | 25.56 | Positive | N/A                                                     |
| 46 | SARS-CoV-2-Pos-46 | F | 18 | 25/08/2021 | 25/08/2021 | Positive | 25/08/2021 | 23.1   | 20.21 | 26.21 | Positive | N/A                                                     |
| 47 | SARS-CoV-2-Pos-47 | F | 32 | 25/08/2021 | 25/08/2021 | Positive | 25/08/2021 | 14.16  | 10.77 | 24.22 | Positive | N/A                                                     |
| 48 | SARS-CoV-2-Pos-48 | F | 52 | 26/08/2021 | 26/08/2021 | Positive | 26/08/2021 | 21.031 | 15.46 | 27.27 | Positive | Fever, cough,<br>congestion                             |
| 49 | SARS-CoV-2-Pos-49 | F | 23 | 29/08/2021 | 29/08/2021 | Positive | 29/08/2021 | 13.14  | 19.73 | 25.69 | Positive | Fever, cough, sore<br>throat, headache,<br>congestion   |
| 50 | SARS-CoV-2-Pos-50 | F | 45 | 29/08/2021 | 29/08/2021 | Positive | 29/08/2021 | 18.31  | 13.69 | 27.82 | Positive | Fever, cough,<br>congestion                             |
| 51 | SARS-CoV-2-Pos-51 | M | 75 | 2/09/2021  | 2/09/2021  | Positive | 2/09/2021  | 23.87  | 19.74 | 24.85 | Positive | Cough, sore throat,<br>headache, congestion,<br>fatigue |
| 52 | SARS-CoV-2-Pos-52 | M | 24 | 2/09/2021  | 2/09/2021  | Positive | 2/09/2021  | 19.57  | 16.61 | 27.27 | Positive | Congestion, loss of<br>taste/smell                      |
| 53 | SARS-CoV-2-Pos-53 | F | 25 | 2/09/2021  | 2/09/2021  | Positive | 2/09/2021  | 21.85  | 19.01 | 26.92 | Positive | Fever, cough,<br>congestion                             |
| 54 | SARS-CoV-2-Pos-54 | M | 27 | 7/09/2021  | 7/09/2021  | Positive | 7/09/2021  | 18.95  | 14.65 | 26.65 | Positive | Asymptomatic                                            |
| 55 | SARS-CoV-2-Pos-55 | M | 19 | 7/09/2021  | 7/09/2021  | Positive | 7/09/2021  | 15.58  | 13.24 | 25.03 | Positive | Asymptomatic                                            |
| 56 | SARS-CoV-2-Pos-56 | F | 29 | 7/09/2021  | 7/09/2021  | Positive | 7/09/2021  | 15.95  | 13.24 | 25.22 | Positive | N/A                                                     |
| 57 | SARS-CoV-2-Pos-57 | M | 28 | 7/09/2021  | 7/09/2021  | Positive | 7/09/2021  | 22.27  | 18.83 | 26.8  | Positive | Fever, headache, cough                                  |
| 58 | SARS-CoV-2-Pos-58 | F | 44 | 7/09/2021  | 7/09/2021  | Positive | 7/09/2021  | 19.3   | 16.16 | 29.39 | Positive | Headache, sore throat                                   |
| 59 | SARS-CoV-2-Pos-59 | F | 52 | 7/09/2021  | 7/09/2021  | Positive | 7/09/2021  | 17.13  | 13.83 | 29.02 | Positive | N/A                                                     |

\*N/A = not available
